# Supplementary material
Source: PubMed Central journal article supplement (PMC1559878)
Supplement: rspb20053161s02.pdf [file rspb20053161s02.pdf]

# **ELECTRONIC APPENDIX**

This is the Electronic Appendix to the article

Markedly different gene expression in wheat grown with organic  
or inorganic sources of nitrogen

by

Chungui Lu, Malcolm J. Hawkesford, Peter B. Barraclough, Paul R. Poulton,  
Ian D. Wilson, Gary L. Barker, and Keith J. Edwards

*Proc. R. Soc. B* ([doi:10.1098/rspb.2005.3161](https://doi.org/10.1098/rspb.2005.3161))

Electronic appendices are refereed with the text; however, no attempt is made  
to impose a uniform editorial style on the electronic appendices.

**Supporting Figure 1.** Hierarchical clustering analysis of ca. 10,000 genes from wheat grain from plants treated with either organic (FYM) or inorganic (N4) fertilizer during 2002-2004. In each case the expression profiles were derived from at least 12 replicates. Values for similarity are indicated.

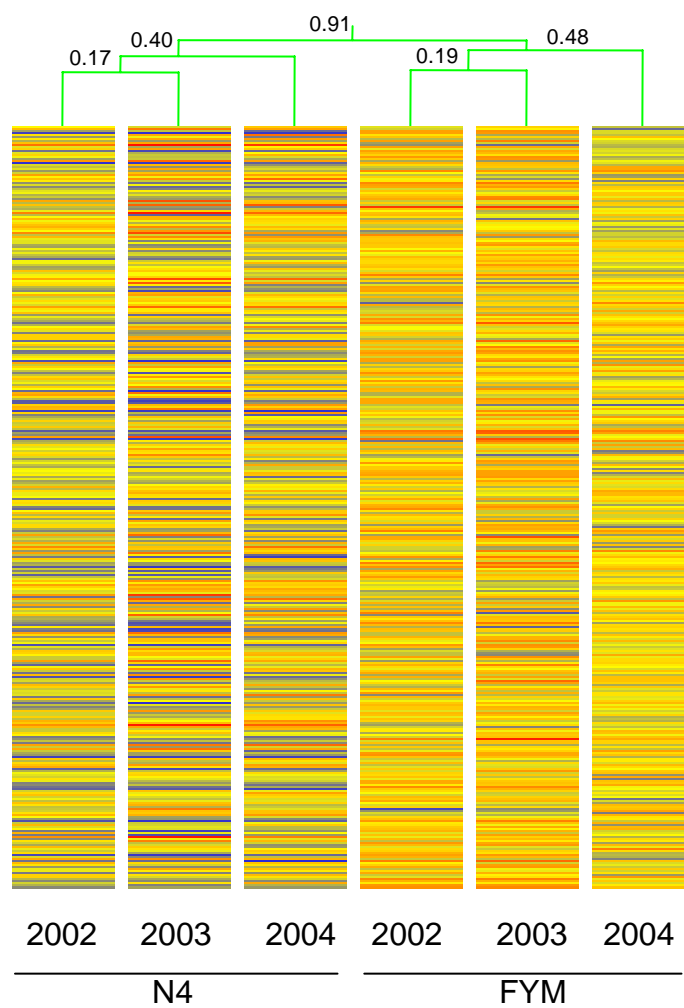

**Supporting Table 1.** Full list of sequences that together constitute the K-mean derived clusters contained with Fig 2C. The first group (2ci) consisting of 474 sequences were all more highly expressed in the developing wheat endosperm following FYM treatment. The second group (2cii) consisting of 190 sequences showed highest expression under N0 and N1 conditions. The third group (2ciii) consisting of 20 genes showed relatively low expression in the low nitrogen treatments and uniformly high expression under the high treatments.

**List of sequences induced by FYM: Figure 2ci**

| accession no. | Gene ID           | Annotation                                                                                                                        |
|---------------|-------------------|-----------------------------------------------------------------------------------------------------------------------------------|
| AL823095      | B10_p133_plate_11 | 1-aminocyclopropane-1-carboxylate oxidase [Phyllostachys edulis]                                                                  |
| AL818695      | D05_1125_plate_12 | 2,3-bisphosphoglycerate-independent phosphoglycerate mutase                                                                       |
| AL825263      | E06_p335_plate_7  | 24.8 kDa class II endochitinase-antifreeze protein precursor [Secale cereale]                                                     |
| AL813730      | D08_e29_plate_9   | 2-isopropylmalate synthase A (Alpha-isopropylmalate synthase A)                                                                   |
| AL821886      | C03_n130_plate_41 | 6-phosphofructo-2-kinase (EC 2.7.1.105) / fructose-2, 6-bisphosphate 2-phosphatase (EC 3.1.3.46) - spinach                        |
| AL818751      | D02_1125_plate_6  | A3 Protein                                                                                                                        |
| AL820607      | C12_o232_plate_15 | acyl carrier family protein /ACP family protein [Arabidopsis thaliana]                                                            |
| AL818114      | B11_j223_plate_12 | alanine aminotransferase 2 (GPT) (Glutamic--pyruvic transaminase 2) (Glutamic--alanine transaminase 2)                            |
| AL812725      | B01_e310_plate_8  | alanine aminotransferase 2 (GPT) (Glutamic--pyruvic transaminase 2) (Glutamic--alanine transaminase 2)                            |
| AL815627      | H03_j223_plate_7  | alcohol dehydrogenase ADH1 [Lycopersicon esculentum]                                                                              |
| AL814414      | F03_h116_plate_10 | aldehyde dehydrogenase [Oryza sativa]                                                                                             |
| AL825292      | H12_p335_plate_7  | aldehyde dehydrogenase family 3, subfamily A2 [Rattus norvegicus]                                                                 |
| AL811288      | F07_d37_plate_3   | alpha/beta-gliadin precursor (Prolamin)                                                                                           |
| AL810715      | A02_d26_plate_3   | alpha/beta-gliadin, wheat gene for storage protein                                                                                |
| AL808756      | F01_a22_plate_7   | alpha-amylase type A isozyme precursor (1,4-alpha-D-glucanohydrolase) (AMY1) (Low pI alpha-amylase)                               |
| AL815161      | A04_h116_plate_9  | alpha-amylase/trypsin inhibitor CM3 precursor                                                                                     |
| AL811497      | C10_d37_plate_9   | alpha-gliadin [Triticum aestivum]                                                                                                 |
| AL814387      | B07_h116_plate_10 | alpha-gliadin [Triticum aestivum]                                                                                                 |
| AL811497      | C10_d37_plate_9   | alpha-gliadin [Triticum aestivum]                                                                                                 |
| AL814494      | F12_h116_plate_11 | alpha-gliadin [Triticum aestivum]                                                                                                 |
| AL814428      | H01_h116_plate_10 | alpha-gliadin [Triticum aestivum]                                                                                                 |
| AL811222      | F11_d37_plate_2   | AmiB [Triticum aestivum]                                                                                                          |
| AL811704      | B12_d15_plate_15  | amino acid permease AAP4 [Vicia faba var. minor]                                                                                  |
| AL827303      | E04_p638_plate_4  | amino acid transporter family protein [Arabidopsis thaliana]                                                                      |
| AL825256      | D08_p335_plate_7  | aminoacylase, putative [Arabidopsis thaliana]                                                                                     |
| AL813527      | E01_e29_plate_10  | aminotransferase family [Arabidopsis thaliana]                                                                                    |
| AL827059      | H12_p638_plate_7  | ammonium transporter [Oryza sativa]                                                                                               |
| AL825698      | H04_p234_plate_14 | ammonium transporter 1-1 [Oryza sativa]                                                                                           |
| AL818310      | A07_j223_plate_15 | ankyrin-like protein-like protein [Sorghum bicolor]                                                                               |
| AL813421      | C08_e29_plate_7   | argininosuccinate synthase (EC 6.3.4.5) - Arabidopsis thaliana                                                                    |
| AL812271      | G01_e310_plate_1  | aspartate aminotransferase, cytoplasmic (Transaminase A)                                                                          |
| AL813524      | D09_e29_plate_10  | A2g5740/F3N11.19 [Arabidopsis thaliana]                                                                                           |
| AL826641      | G05_p537_plate_5  | A5g44560 [Arabidopsis thaliana]                                                                                                   |
| AL821745      | B01_n130_plate_28 | auxin response transcription factor(ARF6) [Arabidopsis thaliana]                                                                  |
| AL826642      | G06_p537_plate_5  | bacterial-induced peroxidase precursor [Gossypium hirsutum]                                                                       |
| AL813084      | E12_e411_plate_10 | Beta-amylase (1,4-alpha-D-glucan maltohydrolase)                                                                                  |
| AL822039      | D05_n130_plate_15 | beta-expansin [Oryza sativa]                                                                                                      |
| AL812788      | F01_e310_plate_9  | CCCH-type zinc finger protein -related [Arabidopsis thaliana]                                                                     |
| AL818624      | F12_1125_plate_10 | CCR4-associated factor -related [Arabidopsis thaliana]                                                                            |
| AL808636      | G04_a22_plate_4   | ceramide glucosyltransferase [Gossypium arboreum]                                                                                 |
| AL822683      | A11_p335_plate_1  | chitinase 3 [Triticum aestivum]                                                                                                   |
| AL817964      | B02_j223_plate_10 | cinnamoyl-CoA reductase family [Arabidopsis thaliana]                                                                             |
| AL815684      | F11_j223_plate_8  | COP9 complex subunit 6 CSN6, putative [Arabidopsis thaliana]                                                                      |
| AL825346      | G09_p335_plate_8  | CRS2-associated factor 2 [Zea mays]                                                                                               |
| AL808761      | F06_a22_plate_7   | cystatin [Triticum aestivum]                                                                                                      |
| AL811650      | D08_d15_plate_11  | cytochrome P450 [Triticum aestivum]                                                                                               |
| AL821748      | B01_n130_plate_38 | cytosolic glyceraldehyde-3-phosphate dehydrogenase [Triticum aestivum].                                                           |
| AL817921      | E01_j223_plate_9  | DHHC-type zinc finger domain-containing protein [Arabidopsis thaliana]                                                            |
| AL818506      | F10_1125_plate_5  | diacylglycerol kinase (EC 2.7.1.107) ATDGK1 - Arabidopsis thaliana                                                                |
| AL811690      | A01_d15_plate_15  | dihydroflavonol 4-reductase [Lophopyrum ponticum x Triticum aestivum]                                                             |
| AL818277      | F04_j223_plate_14 | dihydroflavonol 5-acetyltransferase [Arabidopsis thaliana]                                                                        |
| AL808265      | D08_a22_plate_14  | diphosphonucleotide phosphatase 1 [Lupinus luteus]                                                                                |
| AL820228      | G06_n130_plate_39 | DNA topoisomerase II inhibitor [Triticum aestivum]                                                                                |
| AL818632      | A06_1125_plate_11 | DNA-binding EMBP-1 protein                                                                                                        |
| AL822313      | F05_p234_plate_22 | DnaJ protein homolog - kidney bean (fragment)                                                                                     |
| AL808807      | D01_a22_plate_8   | dnaK-type molecular chaperone HSP70 - barley                                                                                      |
| AL809062      | F08_a11_plate_10  | dTDP-glucose 4-6-dehydratase homolog D18 - Arabidopsis thaliana                                                                   |
| AL813417      | C03_e29_plate_7   | EST B1045D11.20 [Oryza sativa (japonica cultivar-group)]                                                                          |
| AL815839      | C10_j122_plate_10 | EST B1153F04.12 [Oryza sativa (japonica cultivar-group)]                                                                          |
| AL812565      | F05_e310_plate_5  | EST B1153F04.12 [Oryza sativa (japonica cultivar-group)]                                                                          |
| AL822363      | E12_p234_plate_23 | EST B1156H12.22 [Oryza sativa (japonica cultivar-group)]                                                                          |
| AL822608      | G02_p335_plate_10 | EST F22C12.25 [Arabidopsis thaliana]                                                                                              |
| AL812659      | A01_e310_plate_7  | EST OJ000126_13.11 [Oryza sativa (japonica cultivar-group)]                                                                       |
| AL826635      | F08_p537_plate_5  | EST OJ1111_G12.9 [Oryza sativa (japonica cultivar-group)]                                                                         |
| AL816233      | H11_j122_plate_1  | EST OSJNBa0014F07.4 [Oryza sativa (japonica cultivar-group)]                                                                      |
| AL828671      | D11_p739_plate_7  | EST OSJNBa0018M05.2 [Oryza sativa (japonica cultivar-group)]                                                                      |
| AL814857      | C11_h116_plate_4  | EST OSJNBa0019K04.16 [Oryza sativa (japonica cultivar-group)]                                                                     |
| AL813818      | F11_e512_plate_10 | EST OSJNBa0019K04.9 [Oryza sativa (japonica cultivar-group)]                                                                      |
| AL808242      | C08_e22_plate_15  | EST OSJNBa0029H02.25 [Oryza sativa (japonica cultivar-group)]                                                                     |
| AL826373      | B04_p537_plate_1  | EST OSJNBa0034E24.8 [Oryza sativa (japonica cultivar-group)]                                                                      |
| AL813107      | C01_e411_plate_11 | EST OSJNBa0038F22.11 [Oryza sativa (japonica cultivar-group)]                                                                     |
| AL820387      | H10_n130_plate_20 | EST OSJNBa0039G19.15 [Oryza sativa (japonica cultivar-group)]                                                                     |
| AL825495      | D12_p335_plate_16 | EST OSJNBa0060N03.11 [Oryza sativa (japonica cultivar-group)]                                                                     |
| AL812794      | A07_e411_plate_3  | EST OSJNBa0060N03.13 [Oryza sativa (japonica cultivar-group)]                                                                     |
| AL818904      | H06_1125_plate_4  | EST OSJNBa007113.13 [Oryza sativa (japonica cultivar-group)]                                                                      |
| AL815256      | D05_j223_plate_2  | EST OSJNBa0072K14.6 [Oryza sativa (japonica cultivar-group)]                                                                      |
| AL825422      | A07_p335_plate_15 | EST OSJNBa0077M12.11 [Oryza sativa (japonica cultivar-group)]                                                                     |
| AL809294      | C01_a11_plate_16  | EST OSJNBa0084A10.6 [Oryza sativa (japonica cultivar-group)]                                                                      |
| AL825345      | G06_p335_plate_8  | EST OSJNBa0084K11.7 [Oryza sativa (japonica cultivar-group)]                                                                      |
| AL828469      | C07_p739_plate_1  | EST OSJNBa0086P08.10 [Oryza sativa (japonica cultivar-group)]                                                                     |
| AL821905      | C05_n130_plate_15 | EST OSJNBa0015N08.9 [Oryza sativa (japonica cultivar-group)]                                                                      |
| AL821732      | A12_n130_plate_15 | EST OSJNBa0017I01.8 [Oryza sativa (japonica cultivar-group)]                                                                      |
| AL813276      | C08_e411_plate_15 | EST OSJNBa0020J19.5 [Oryza sativa (japonica cultivar-group)]                                                                      |
| AL821766      | B03_n130_plate_15 | EST OSJNBa0021A09.5 [Oryza sativa (japonica cultivar-group)]                                                                      |
| AL827192      | B01_p638_plate_6  | EST OSJNBa0062H02.6 [Oryza sativa (japonica cultivar-group)]                                                                      |
| AL817122      | E06_j324_plate_3  | EST OSJNBa0068N06.18 [Oryza sativa (japonica cultivar-group)]                                                                     |
| AL813291      | E05_e411_plate_15 | EST OSJNBa0079B01.6 [Oryza sativa (japonica cultivar-group)]                                                                      |
| AL820249      | G08_n130_plate_41 | EST OSJNBa0086G13.7 [Oryza sativa (japonica cultivar-group)]                                                                      |
| AL827421      | F09_p638_plate_2  | EST OSJNBa0118P14.14 [Oryza sativa (japonica cultivar-group)]                                                                     |
| AL827231      | E06_p638_plate_5  | EST P0019D06.11 [Oryza sativa (japonica cultivar-group)]                                                                          |
| AL817052      | B09_j324_plate_2  | EST P0406G08.7 [Oryza sativa (japonica cultivar-group)]                                                                           |
| AL811402      | H02_d37_plate_9   | EST P0431G06.3 [Oryza sativa (japonica cultivar-group)]                                                                           |
| AL811521      | B05_p638_plate_2  | EST P0443D08.1 [Oryza sativa (japonica cultivar-group)]                                                                           |
| AL827458      | C12_j324_plate_2  | EST P0446G04.14 [Oryza sativa (japonica cultivar-group)]                                                                          |
| AL817063      | F03_n129_plate_12 | EST P0470A12.35 [Oryza sativa (japonica cultivar-group)]                                                                          |
| AL819608      | F09_1125_plate_11 | EST P0481E12.28 [Oryza sativa (japonica cultivar-group)]                                                                          |
| AL818661      | C12_e29_plate_2   | EST P0503E05.29 [Oryza sativa (japonica cultivar-group)]                                                                          |
| AL810422      | E03_p335_plate_16 | EST P0529E05.24 [Oryza sativa (japonica cultivar-group)]                                                                          |
| AL825497      | H07_j122_plate_13 | EST P0686C03.10 [Oryza sativa (japonica cultivar-group)]                                                                          |
| AL816060      | H10_d37_plate_1   | EST P0686E09.7 [Oryza sativa (japonica cultivar-group)]                                                                           |
| AL811172      | G11_j226_plate_9  | EST P0699H05.17 [Oryza sativa (japonica cultivar-group)]                                                                          |
| AL817684      | B04_j223_plate_15 | ESTs AU068856(C50756),AU077979(C61370) correspond to a region of eukaryotic cap-binding protein [imported] - Arabidopsis thaliana |
| AL809092      | A12_a11_plate_12  | expressed protein [Arabidopsis thaliana]                                                                                          |
| AL811401      | C04_h116_plate_13 | expressed protein [Arabidopsis thaliana]                                                                                          |
| AL827537      | A07_p638_plate_1  | expressed protein [Arabidopsis thaliana]                                                                                          |
| AL817898      | B05_j223_plate_9  | expressed protein [Arabidopsis thaliana]                                                                                          |
| AL814066      | B06_e512_plate_1  | expressed protein [Arabidopsis thaliana]                                                                                          |
| AL824834      | B12_e234_plate_4  | expressed protein [Arabidopsis thaliana]                                                                                          |
| AL808802      | C03_a22_plate_8   | expressed protein [Arabidopsis thaliana]                                                                                          |
| AL812745      | D03_e310_plate_8  | expressed protein [Arabidopsis thaliana]                                                                                          |

|          |                   |                                                                                                                |
|----------|-------------------|----------------------------------------------------------------------------------------------------------------|
| AL811361 | D05_d37_plate_5   | expressed protein [Arabidopsis thaliana]                                                                       |
| AL819245 | E08_n129_plate_17 | expressed protein [Arabidopsis thaliana]                                                                       |
| AL810134 | F08_d15_plate_6   | expressed protein [Arabidopsis thaliana]                                                                       |
| AL814048 | G02_e512_plate_15 | expressed protein [Arabidopsis thaliana]                                                                       |
| AL818289 | G05_j223_plate_14 | expressed protein [Arabidopsis thaliana]                                                                       |
| AL822253 | G06_p234_plate_21 | expressed protein [Arabidopsis thaliana]                                                                       |
| AL818363 | G09_j223_plate_15 | expressed protein [Arabidopsis thaliana]                                                                       |
| AL818295 | G12_j223_plate_14 | expressed protein [Arabidopsis thaliana]                                                                       |
| AL814918 | B08_h116_plate_5  | F1F0-ATPase inhibitor protein [Oryza sativa (japonica cultivar-group)]                                         |
| AL821423 | B06_p133_plate_9  | farnesylated protein 1 [Hordeum vulgare subsp. vulgare]                                                        |
| AL812649 | G08_e310_plate_6  | fatty acid alpha-oxidase [Oryza sativa]                                                                        |
| AL827345 | H08_p638_plate_3  | fiber protein FB15 [Gossypium barbadense]                                                                      |
| AL814385 | B04_h116_plate_10 | gamma-gliadin [Triticum aestivum]                                                                              |
| AL814434 | H08_h116_plate_10 | gamma-gliadin [Triticum aestivum]                                                                              |
| AL815127 | D06_h116_plate_8  | gamma-gliadin [Triticum aestivum]                                                                              |
| AL814629 | G02_h116_plate_13 | gamma-gliadin [Triticum aestivum]                                                                              |
| AL812759 | E10_e310_plate_8  | gamma-gliadin [Triticum urartu]                                                                                |
| AL814533 | C06_h116_plate_12 | gamma-gliadin B precursor                                                                                      |
| AL820072 | F04_n130_plate_28 | GDSL-motif lipase/hydrolase-like protein [Oryza sativa (japonica cultivar-group)]                              |
| AL813789 | B04_e512_plate_10 | gene iojap protein - maize                                                                                     |
| AL827942 | G08_p739_plate_3  | gene_id:MPE11.12-unknown protein [Arabidopsis thaliana]                                                        |
| AL815141 | F09_h116_plate_8  | gene_id:MYN8.3-pir[TH0289]-similar to unknown protein [Arabidopsis thaliana]                                   |
| AL825719 | B09_p234_plate_15 | GLN1Oryza glutamine synthetase root isozyme glutamate--ammonia ligase [Oryza sativa (japonica cultivar-group)] |
| AL814758 | F11_h116_plate_2  | Glucose-6-phosphate isomerase, cytosolic (Phosphoglucose isomerase) (PGI) (Phosphohexose isomerase) (PHI)      |
| AL825153 | H01_p335_plate_5  | glutamine-dependent asparagine synthetase 1 [Hordeum vulgare subsp vulgare]                                    |
| AL827161 | E03_p638_plate_6  | glutaredoxin [Populus tremula x Populus tremuloides]                                                           |
| AL820106 | F07_n130_plate_20 | glutathione transferase [Triticum aestivum]                                                                    |
| AL827212 | G06_p638_plate_5  | glutathione-S-transferase Cla47 [Triticum aestivum]                                                            |
| AL813261 | C06_e310_plate_4  | glutenin high molecular weight chain 1B-y9 precursor - wheat                                                   |
| AL812662 | A04_e310_plate_7  | glutenin high molecular weight chain Dc5 - wheat                                                               |
| AL812040 | A08_e310_plate_10 | glutenin subunit group 5 type IIIlow-molecular-weight [Triticum aestivum]                                      |
| AL814638 | H04_h116_plate_13 | glutenin y-subunit [Thinopyrum ponticum x Triticum aestivum]                                                   |
| AL814486 | F04_h116_plate_11 | glutenin, low molecular weight subunit ptdud1 precursor                                                        |
| AL821999 | D01_n130_plate_1  | glycine-rich protein [Arabidopsis thaliana]                                                                    |
| AL809176 | F01_a11_plate_13  | glycine-rich RNA-binding protein-like [Oryza sativa (japonica cultivar-group)]                                 |
| AL823233 | C10_p133_plate_1  | glycosyltransferase family 2 [Arabidopsis thaliana]                                                            |
| AL814604 | D04_h116_plate_13 | grain softness protein 1a, 15K (clone TSF69) - wheat                                                           |
| AL812268 | F09_e310_plate_1  | Guanine nucleotide-binding protein beta subunit-like protein (GPB-LR) (RWD)                                    |
| AL825852 | B10_p234_plate_17 | high-affinity phosphate transporter PT1 [Triticum aestivum]                                                    |
| AL815651 | B10_j223_plate_8  | histone H1 WH1A.2 [Triticum aestivum]                                                                          |
| AL826759 | G12_p537_plate_8  | Histone H2A                                                                                                    |
| AL811244 | B01_d37_plate_3   | Histone H2B.2                                                                                                  |
| AL813565 | A10_e29_plate_11  | Histone H3                                                                                                     |
| AL810143 | G11_d15_plate_6   | Histone H3                                                                                                     |
| AL825991 | E06_p234_plate_19 | histone H4 (TH091) - wheat                                                                                     |
| AL808706 | H02_a22_plate_6   | hypersensitive-induced reaction protein 2 [Hordeum vulgare subsp vulgare]                                      |
| AL813786 | A10_e512_plate_10 | hypothetical protein [Arabidopsis thaliana]                                                                    |
| AL813361 | C11_e29_plate_6   | hypothetical protein [Arabidopsis thaliana]                                                                    |
| AL818732 | B01_i125_plate_6  | hypothetical protein [Oryza sativa (japonica cultivar-group)]                                                  |
| AL809015 | B06_a22_plate_13  | hypothetical protein [Oryza sativa (japonica cultivar-group)]                                                  |
| AL811056 | D01_d26_plate_17  | hypothetical protein [Oryza sativa (japonica cultivar-group)]                                                  |
| AL829536 | H06_p840_plate_1  | Hypothetical protein [Oryza sativa (japonica cultivar-group)]                                                  |
| AL819778 | A08_n129_plate_5  | hypothetical protein [Oryza sativa]                                                                            |
| AL809540 | F02_a11_plate_4   | hypothetical protein [Oryza sativa]                                                                            |
| AL815046 | C06_h116_plate_7  | hypothetical protein [Plasmodium falciparum 3D7]                                                               |
| AL821421 | B04_p133_plate_9  | hypothetical protein [Plasmodium yoelii yoelii]                                                                |
| AL816745 | G10_j226_plate_2  | hypothetical protein At2g42780 [imported] - Arabidopsis thaliana                                               |
| AL815135 | E10_h116_plate_8  | hypothetical protein F22D16.11 - Arabidopsis thaliana                                                          |
| AL812995 | E11_e411_plate_8  | hypothetical protein T2211.11 - Arabidopsis thaliana                                                           |
| AL822001 | D01_n130_plate_21 | inner envelope membrane protein precursor, non-green plastid - wild cabbage                                    |
| AL816748 | H05_j226_plate_2  | KH domain protein [Arabidopsis thaliana]                                                                       |
| AL814909 | A08_h116_plate_5  | L-ascorbate oxidase (EC 1.10.3.3) - rice (fragment)                                                            |
| AL826404 | F08_p537_plate_1  | lateral organ boundaries (LOB) domain protein 37 (LBD37)                                                       |
| AL812734 | C01_e310_plate_8  | legumin-like protein [Zea mays]                                                                                |
| AL827134 | H10_p638_plate_6  | lipase (class 3) family [Arabidopsis thaliana]                                                                 |
| AL818340 | E01_j223_plate_15 | lipid body-associated major protein L3 - maize (fragment)                                                      |
| AL814453 | H07_h116_plate_10 | long-chain-fatty-acid-CoA ligase (acyl-CoA synthetase) family                                                  |
| AL814388 | B09_h116_plate_10 | low molecular weight glutenin subunit [Triticum turgidum subsp. durum]                                         |
| AL814379 | A09_h116_plate_10 | low-molecular-weight glutenin subunit group 4 type II [Triticum aestivum]                                      |
| AL821331 | E06_p133_plate_7  | low-temperature-specific protein TACR7 - wheat (fragment)                                                      |
| AL810279 | D10_d15_plate_9   | MADS-box transcription factor AG [Agapanthus praecox]                                                          |
| AL819876 | D02_n129_plate_6  | MAP kinase homolog [Triticum aestivum]                                                                         |
| AL808683 | C02_a22_plate_6   | MCM3-associated protein - related [Arabidopsis thaliana]                                                       |
| AL819761 | G09_n129_plate_4  | membrane import protein-like [Arabidopsis thaliana]                                                            |
| AL818048 | D03_j223_plate_11 | methyltransferase-related protein [Arabidopsis thaliana]                                                       |
| AL811144 | E05_d37_plate_1   | microtubule-binding protein TANGLED1 [Zea mays]                                                                |
| AL819641 | C07_n129_plate_2  | mitochondrial aldehyde dehydrogenase [Secale cereale]                                                          |
| AL818479 | B09_i125_plate_5  | Moco containing protein [Oryza sativa (japonica cultivar-group)]                                               |
| AL816989 | B05_j324_plate_1  | nicotianamine aminotransferase [Hordeum vulgare subsp. vulgare]                                                |
| AL826672 | B12_p537_plate_6  | Nicotianamine synthase 1 (HvNAS1)                                                                              |
| AL827652 | D05_p638_plate_13 | nitrate reductase [NADH] (NR)                                                                                  |
| AL825459 | F10_p335_plate_15 | nitrate reductase [NADH] (NR)                                                                                  |
| AL825261 | E03_p335_plate_7  | nitrate transporter NRT1-5 [Oryza sativa (japonica cultivar-group)]                                            |
| AL827725 | D05_p638_plate_15 | nitrogen fixation sensor protein fixL, two-component, [Mesorhizobium loti MAFF303099]                          |
| AL808543 | A01_a22_plate_11  | no hits                                                                                                        |
| AL814109 | A01_e512_plate_3  | no hits                                                                                                        |
| AL821629 | A02_n130_plate_15 | no hits                                                                                                        |
| AL815875 | A03_j122_plate_11 | no hits                                                                                                        |
| AL827342 | A03_p638_plate_4  | no hits                                                                                                        |
| AL816439 | A04_j122_plate_5  | no hits                                                                                                        |
| AL814716 | A05_h116_plate_2  | no hits                                                                                                        |
| AL814584 | A09_h116_plate_13 | no hits                                                                                                        |
| AL819723 | A09_n129_plate_4  | no hits                                                                                                        |
| AL811015 | A10_d26_plate_16  | no hits                                                                                                        |
| AL816008 | A10_j122_plate_13 | no hits                                                                                                        |
| AL815300 | A10_j223_plate_3  | no hits                                                                                                        |
| AL809326 | A12_a11_plate_17  | no hits                                                                                                        |
| AL812975 | B01_e411_plate_8  | no hits                                                                                                        |
| AL808309 | B02_a22_plate_15  | no hits                                                                                                        |
| AL813194 | B02_e411_plate_13 | no hits                                                                                                        |
| AL814362 | B02_e512_plate_9  | no hits                                                                                                        |
| AL821761 | B02_n130_plate_48 | no hits                                                                                                        |
| AL816012 | B03_j122_plate_13 | no hits                                                                                                        |
| AL821771 | B03_n130_plate_41 | no hits                                                                                                        |
| AL822631 | B03_p335_plate_11 | no hits                                                                                                        |
| AL810403 | B04_e29_plate_2   | no hits                                                                                                        |
| AL816446 | B04_j122_plate_5  | no hits                                                                                                        |
| AL808726 | B06_a22_plate_7   | no hits                                                                                                        |
| AL812602 | B06_e310_plate_6  | no hits                                                                                                        |
| AL817968 | B06_j223_plate_10 | no hits                                                                                                        |
| AL818032 | B06_j223_plate_11 | no hits                                                                                                        |
| AL827187 | B06_p638_plate_6  | no hits                                                                                                        |
| AL815173 | B08_h116_plate_9  | no hits                                                                                                        |
| AL827326 | B09_p638_plate_4  | no hits                                                                                                        |
| AL812378 | B11_e310_plate_3  | no hits                                                                                                        |
| AL812531 | B11_e310_plate_5  | no hits                                                                                                        |
| AL815652 | B11_j223_plate_8  | no hits                                                                                                        |
| AL816133 | B12_j122_plate_15 | no hits                                                                                                        |
| AL817457 | B12_j324_plate_11 | no hits                                                                                                        |
| AL827811 | C01_p739_plate_11 | no hits                                                                                                        |
| AL810269 | C02_d15_plate_9   | no hits                                                                                                        |
| AL819409 | C02_n129_plate_20 | no hits                                                                                                        |

|          |                   |                                                           |
|----------|-------------------|-----------------------------------------------------------|
| AL811130 | C03_d37_plate_1   | no hits                                                   |
| AL824837 | C03_p234_plate_4  | no hits                                                   |
| AL815958 | C04_j122_plate_12 | no hits                                                   |
| AL827111 | C04_p638_plate_7  | no hits                                                   |
| AL812610 | C07_e310_plate_6  | no hits                                                   |
| AL816136 | C07_j122_plate_15 | no hits                                                   |
| AL816324 | C08_j122_plate_3  | no hits                                                   |
| AL826677 | C08_p537_plate_6  | no hits                                                   |
| AL813328 | C09_e411_plate_2  | no hits                                                   |
| AL816458 | C09_j122_plate_5  | no hits                                                   |
| AL821946 | C09_n130_plate_1  | no hits                                                   |
| AL817649 | C10_l226_plate_9  | no hits                                                   |
| AL815964 | D01_j122_plate_12 | no hits                                                   |
| AL809299 | D02_a11_plate_16  | no hits                                                   |
| AL816329 | D02_j122_plate_3  | no hits                                                   |
| AL812686 | D03_e310_plate_7  | no hits                                                   |
| AL816202 | D03_j122_plate_1  | no hits                                                   |
| AL809214 | D06_a11_plate_14  | no hits                                                   |
| AL822060 | D06_n130_plate_48 | no hits                                                   |
| AL819880 | D07_n129_plate_6  | no hits                                                   |
| AL822066 | D07_n130_plate_15 | no hits                                                   |
| AL818535 | D08_l125_plate_7  | no hits                                                   |
| AL827442 | D08_p638_plate_2  | no hits                                                   |
| AL812749 | D09_e310_plate_8  | no hits                                                   |
| AL825190 | D09_p335_plate_6  | no hits                                                   |
| AL809037 | D10_a22_plate_13  | no hits                                                   |
| AL812988 | D10_e411_plate_8  | no hits                                                   |
| AL814800 | D11_h116_plate_3  | no hits                                                   |
| AL823045 | D11_p133_plate_10 | no hits                                                   |
| AL827659 | D12_p638_plate_13 | no hits                                                   |
| AL816145 | E01_j122_plate_15 | no hits                                                   |
| AL810987 | E02_d26_plate_15  | no hits                                                   |
| AL812990 | E02_e411_plate_8  | no hits                                                   |
| AL815844 | E02_j122_plate_10 | no hits                                                   |
| AL811719 | E03_d15_plate_15  | no hits                                                   |
| AL811461 | E03_d37_plate_8   | no hits                                                   |
| AL814612 | E03_h116_plate_13 | no hits                                                   |
| AL816086 | E03_j122_plate_14 | no hits                                                   |
| AL810433 | E04_e29_plate_2   | no hits                                                   |
| AL813593 | E04_e29_plate_11  | no hits                                                   |
| AL818700 | E04_l125_plate_12 | no hits                                                   |
| AL816087 | E05_j122_plate_14 | no hits                                                   |
| AL818540 | E05_l125_plate_7  | no hits                                                   |
| AL825498 | E05_p335_plate_16 | no hits                                                   |
| AL822303 | E06_p234_plate_22 | no hits                                                   |
| AL817926 | E07_j223_plate_9  | no hits                                                   |
| AL815472 | E09_j223_plate_5  | no hits                                                   |
| AL816215 | E10_j122_plate_1  | no hits                                                   |
| AL816409 | E10_j122_plate_4  | no hits                                                   |
| AL815605 | E10_j223_plate_7  | no hits                                                   |
| AL821278 | E11_p133_plate_6  | no hits                                                   |
| AL808345 | E12_a22_plate_15  | no hits                                                   |
| AL814411 | E12_h116_plate_10 | no hits                                                   |
| AL822308 | E12_p234_plate_22 | no hits                                                   |
| AL815912 | F01_j122_plate_11 | no hits                                                   |
| AL818275 | F01_j223_plate_14 | no hits                                                   |
| AL811285 | F03_d37_plate_3   | no hits                                                   |
| AL820060 | F03_n130_plate_15 | no hits                                                   |
| AL816347 | F04_j122_plate_3  | no hits                                                   |
| AL816096 | F05_j122_plate_14 | no hits                                                   |
| AL817932 | F05_j223_plate_9  | no hits                                                   |
| AL810372 | F06_e29_plate_1   | no hits                                                   |
| AL814942 | F06_h116_plate_5  | no hits                                                   |
| AL815003 | F06_h116_plate_6  | no hits                                                   |
| AL816544 | F06_j122_plate_6  | no hits                                                   |
| AL815917 | F07_j122_plate_11 | no hits                                                   |
| AL814816 | F08_h116_plate_3  | no hits                                                   |
| AL818212 | F08_j223_plate_13 | no hits                                                   |
| AL818354 | F08_j223_plate_15 | no hits                                                   |
| AL818621 | F08_l125_plate_10 | no hits                                                   |
| AL811369 | F10_d37_plate_5   | no hits                                                   |
| AL816286 | F10_j122_plate_2  | no hits                                                   |
| AL814421 | F12_h116_plate_10 | no hits                                                   |
| AL814628 | F12_h116_plate_13 | no hits                                                   |
| AL815988 | G01_j122_plate_12 | no hits                                                   |
| AL827284 | G03_p638_plate_4  | no hits                                                   |
| AL817237 | G04_j324_plate_6  | no hits                                                   |
| AL822174 | G04_p234_plate_20 | no hits                                                   |
| AL828690 | G04_p739_plate_7  | no hits                                                   |
| AL818006 | G05_j223_plate_10 | no hits                                                   |
| AL823265 | G05_p133_plate_1  | no hits                                                   |
| AL810956 | G06_d26_plate_14  | no hits                                                   |
| AL814166 | G06_e512_plate_4  | no hits                                                   |
| AL820230 | G06_n130_plate_45 | no hits                                                   |
| AL821072 | G06_o232_plate_6  | no hits                                                   |
| AL820639 | G10_o232_plate_15 | no hits                                                   |
| AL808596 | G11_a22_plate_11  | no hits                                                   |
| AL813914 | G12_e512_plate_12 | no hits                                                   |
| AL816558 | G12_j122_plate_6  | no hits                                                   |
| AL808598 | H01_a22_plate_11  | no hits                                                   |
| AL810707 | H02_d26_plate_1   | no hits                                                   |
| AL813133 | H02_e411_plate_11 | no hits                                                   |
| AL814505 | H02_h116_plate_11 | no hits                                                   |
| AL808365 | H04_a22_plate_15  | no hits                                                   |
| AL813690 | H04_e29_plate_12  | no hits                                                   |
| AL816114 | H04_j122_plate_14 | no hits                                                   |
| AL816298 | H05_j122_plate_2  | no hits                                                   |
| AL816115 | H05_j122_plate_14 | no hits                                                   |
| AL812834 | H08_e411_plate_3  | no hits                                                   |
| AL815938 | H08_j122_plate_11 | no hits                                                   |
| AL816168 | H08_j122_plate_15 | no hits                                                   |
| AL809009 | H10_a22_plate_12  | no hits                                                   |
| AL816435 | H11_j122_plate_4  | no hits                                                   |
| AL816061 | H11_j122_plate_13 | no hits                                                   |
| AL821154 | H11_o232_plate_10 | no hits                                                   |
| AL818373 | H12_j223_plate_15 | no hits                                                   |
| AL821162 | H12_o232_plate_7  | no hits                                                   |
| AL829903 | H12_p840_plate_10 | no hits                                                   |
| AL815009 | G05_h116_plate_6  | no hits                                                   |
| AL822228 | E01_p234_plate_21 | no hits                                                   |
| AL808808 | D02_a22_plate_8   | no hits                                                   |
| AL811619 | H01_d15_plate_10  | no hits                                                   |
| AL810475 | B01_e29_plate_3   | no hits                                                   |
| AL826684 | D08_p537_plate_6  | no hits                                                   |
| AL826096 | C06_p436_plate_3  | no hits                                                   |
| AL827977 | C12_p739_plate_4  | no hits                                                   |
| AL826611 | D05_p537_plate_5  | no hits                                                   |
| AL810609 | A10_e29_plate_5   | Nuclear transport factor 2 (NTF-2)                        |
| AL818052 | D08_j223_plate_11 | oleosin [Arabidopsis thaliana]                            |
| AL826883 | F01_p638_plate_10 | O-methyltransferase [Secale cereale]                      |
| AL809573 | B08_a11_plate_5   | OSINBa0010H02.29 [Oryza sativa (japonica cultivar-group)] |
| AL820049 | F02_n130_plate_1  | OsNAC3 protein [Oryza sativa]                             |

AL820225 G06\_n130\_plate\_20 p27KIP1-related-protein 1 [Lycopersicon esculentum]  
 AL820151 F11\_n130\_plate\_38 P450 [Triticum aestivum]  
 AL816723 E03\_j226\_plate\_2 pentatricopeptide (PPR) repeat-containing protein [Arabidopsis thaliana]  
 AL819950 E04\_n130\_plate\_20 peroxidase (EC 1.11.1.7) 2 precursor - wheat  
 AL826434 H08\_p537\_plate\_2 peroxidase (EC 1.11.1.7) 4 precursor - wheat  
 AL825665 D02\_p234\_plate\_14 Peroxidase 1 precursor  
 AL827125 A08\_p638\_plate\_7 peroxidoredoxin - like protein [Arabidopsis thaliana]  
 AL818153 G06\_j223\_plate\_12 PHD-finger family homeodomain protein [Oryza sativa (japonica cultivar-group)]  
 AL812780 H05\_e310\_plate\_8 phi-1 [Nicotiana tabacum]  
 AL821024 F07\_o232\_plate\_6 phosphoenolpyruvate carboxylase [Triticum aestivum]  
 AL814858 C12\_h116\_plate\_4 phosphofruktokinase beta subunit-related [Arabidopsis thaliana]  
 AL816191 B11\_j122\_plate\_1 phytoene synthase [Rubrivivax gelatinosus]  
 AL822090 D09\_n130\_plate\_38 phytoene synthase [Zea mays]  
 AL816632 A10\_j226\_plate\_1 plasma membrane associated protein [Hordeum vulgare]  
 AL815097 A01\_h116\_plate\_8 Polycomb protein EZ2 (Enhancer of zeste protein 2)  
 AL823014 A12\_p133\_plate\_10 polypyrimidine tract-binding protein [Malus x domestica]  
 AL812387 C10\_e310\_plate\_3 precursor monofunctional aspartokinase-like protein [Oryza sativa (japonica cultivar-group)]  
 AL812653 H02\_e310\_plate\_6 probable chloroplast 50S ribosomal protein L28 [imported] - Arabidopsis thaliana  
 AL813566 A12\_e29\_plate\_11 Probable methionyl-tRNA synthetase (Methionine-tRNA ligase)  
 AL825157 H07\_p335\_plate\_5 Probable nicotianamine synthase 2  
 AL821213 E01\_p133\_plate\_5 progesterone 5-beta-reductase [Oryza sativa (japonica cultivar-group)]  
 AL821959 C10\_n130\_plate\_20 protein arginine N-methyltransferase, putative [Arabidopsis thaliana ]  
 AL812723 A08\_e310\_plate\_8 protein phosphatase 2A Bkappa subunit [Oryza sativa (japonica cultivar-group)]  
 AL817130 F06\_j324\_plate\_3 proteinase inhibitor - rice  
 AL808880 F03\_a22\_plate\_9 putative 26S proteasome subunit [Oryza sativa (japonica cultivar-group)]  
 AL814448 B05\_h116\_plate\_11 putative 2-oxoglutarate dehydrogenase, E1 subunit [Oryza sativa (japonica cultivar-group)]  
 AL828144 C03\_p436\_plate\_11 putative acid phosphatase [Hordeum vulgare subsp. vulgare]  
 AL822169 F11\_p234\_plate\_20 putative amino acid transporter [Oryza sativa]  
 AL822279 B08\_p234\_plate\_22 Putative anthocyanidin 3-glucosidase [Oryza sativa (japonica cultivar-group)]  
 AL812676 C01\_e310\_plate\_7 putative aspartic protease [Oryza sativa (japonica cultivar-group)]  
 AL810897 E04\_d26\_plate\_13 putative aspartic protease [Oryza sativa (japonica cultivar-group)]  
 AL828526 B05\_p739\_plate\_2 Putative ATPase I subunit from chromosome 10 chloroplast insertion [Oryza sativa (japonica cultivar-group)]  
 AL812591 A04\_e310\_plate\_6 putative auxin-induced protein [Oryza sativa (japonica cultivar-group)]  
 AL814699 F12\_h116\_plate\_1 putative calcium-dependent protein kinase [Oryza sativa (japonica cultivar-group)]  
 AL815609 F02\_j223\_plate\_7 putative casein kinase II beta subunit [Oryza sativa]  
 AL811537 C10\_d37\_plate\_10 putative cop-coated vesicle membrane protein [Oryza sativa (japonica cultivar-group)]  
 AL816235 A01\_j122\_plate\_2 Putative copia-like retrotransposon polyprotein [Oryza sativa (japonica cultivar-group)]  
 AL820192 G03\_n130\_plate\_1 putative cytochrome c oxidase subunit VIa precursor [Oryza sativa (japonica cultivar-group)]  
 AL816398 D08\_j122\_plate\_4 putative cytochrome P450 [Lolium rigidum]  
 AL815566 H12\_j223\_plate\_6 putative DAG protein [Arabidopsis thaliana]  
 AL822928 E06\_p335\_plate\_4 putative decarboxylase [Oryza sativa (japonica cultivar-group)]  
 AL823258 E02\_p234\_plate\_23 putative dermal glycoprotein precursor [Oryza sativa (japonica cultivar-group)]  
 AL820247 G08\_n130\_plate\_28 putative DNA damage repair protein [Oryza sativa (japonica cultivar-group)]  
 AL812273 G03\_e310\_plate\_1 putative E12A11 protein [Oryza sativa (japonica cultivar-group)]  
 AL822886 H10\_p335\_plate\_3 putative ERD4 protein [Oryza sativa (japonica cultivar-group)]  
 AL829514 E09\_p840\_plate\_1 putative FAS1 [Oryza sativa]  
 AL828340 F11\_p436\_plate\_16 putative flavonol 3-sulfoxyltransferase [Oryza sativa (japonica cultivar-group)]  
 AL828320 B11\_p436\_plate\_16 putative Glucan 1,3-beta-glucosidase precursor [Oryza sativa (japonica cultivar-group)]  
 AL825195 E05\_p335\_plate\_6 putative high affinity nitrate transporter [Hordeum vulgare]  
 AL827329 B06\_p638\_plate\_4 putative ionotropic glutamate receptor homolog GLR4 [Oryza sativa (japonica cultivar-group)]  
 AL815158 A01\_h116\_plate\_9 putative Mannose-P-dolichol utilization defect 1 protein homolog [Oryza sativa (japonica cultivar-group)]  
 AL827236 D09\_p638\_plate\_5 putative NADH dehydrogenase [Oryza sativa (japonica cultivar-group)]  
 AL817918 D10\_j223\_plate\_9 putative outer envelope protein [Oryza sativa (japonica cultivar-group)]  
 AL826703 G05\_p537\_plate\_6 putative peptide transporter [Oryza sativa]  
 AL816643 B12\_j226\_plate\_1 putative peptidyl-prolyl cis-trans isomerase [Oryza sativa (japonica cultivar-group)]  
 AL827112 C02\_p638\_plate\_7 putative phospholipase [Oryza sativa]  
 AL825255 D07\_p335\_plate\_7 putative PrMC3 [Oryza sativa (japonica cultivar-group)]  
 AL814910 A09\_h116\_plate\_5 putative protein disulfide isomerase [Oryza sativa (japonica cultivar-group)]  
 AL815247 C02\_j223\_plate\_2 putative protein kinase APK1A [Arabidopsis thaliana] [Oryza sativa (japonica cultivar-group)]  
 AL818154 G08\_j223\_plate\_12 Putative protein with HVA22 domain [Oryza sativa (japonica cultivar-group)]  
 AL822992 D08\_p335\_plate\_5 putative receptor protein kinase [Oryza sativa (japonica cultivar-group)]  
 AL816205 D08\_j122\_plate\_1 Putative reverse transcriptase [Oryza sativa (japonica cultivar-group)]  
 AL820431 C06\_o232\_plate\_11 putative ribonucleoside-diphosphate reductase [Oryza sativa (japonica cultivar-group)]  
 AL827428 F02\_p638\_plate\_2 putative ribosomal protein L18 [Oryza sativa (japonica cultivar-group)]  
 AL809770 C01\_a11\_plate\_9 putative ribosomal protein S18 [Triticum aestivum]  
 AL817458 C01\_j324\_plate\_11 putative RNA helicase, DRH1 [Oryza sativa (japonica cultivar-group)]  
 AL812230 B10\_e310\_plate\_11 putative senescence-associated protein [Pisum sativum]  
 AL811157 F10\_d37\_plate\_1 putative serine-threonine protein kinase [Oryza sativa (japonica cultivar-group)]  
 AL818331 C12\_j223\_plate\_15 putative speckle-type POZ protein [Oryza sativa (japonica cultivar-group)]  
 AL826356 B09\_p436\_plate\_10 putative stearyl-acyl carrier protein desaturase [Oryza sativa (japonica cultivar-group)]  
 AL813127 G04\_e411\_plate\_11 putative step II splicing factor [Arabidopsis thaliana]  
 AL812393 D04\_e310\_plate\_3 putative trypanothione-dependent peroxidase [Oryza sativa (japonica cultivar-group)]  
 AL819235 D08\_n129\_plate\_17 putative tubby protein [Oryza sativa (japonica cultivar-group)]  
 AL825395 E10\_p335\_plate\_9 putative ubiquinol-cytochrome c reductase [Oryza sativa (japonica cultivar-group)]  
 AL811434 H01\_d37\_plate\_7 putative ubiquitin-specific protease [Oryza sativa (japonica cultivar-group)]  
 AL808290 G01\_a22\_plate\_14 putative UDP-glucose 4-epimerase [Oryza sativa (japonica cultivar-group)]  
 AL814470 D10\_h116\_plate\_11 putative xylanase inhibitor protein [Triticum turgidum subsp. durum]  
 AL809873 E09\_d15\_plate\_2 putative zinc finger protein [Oryza sativa (japonica cultivar-group)]  
 AL822204 B09\_p234\_plate\_21 putative zinc finger protein [Oryza sativa]  
 AL817125 E11\_j324\_plate\_3 rab28 protein - maize  
 AL818066 E11\_j223\_plate\_11 replication licensing factor MCM7 homologue [Zea mays]  
 AL812978 B08\_e411\_plate\_8 respiratory burst oxidase homolog [Solanum tuberosum]  
 AL828040 C08\_p739\_plate\_5 ribulose 1,5-bisphosphate carboxylase/oxygenase large chain [Triticum aestivum]  
 AL810636 F06\_e29\_plate\_5 seed storage protein [Triticum aestivum]  
 AL822366 F07\_p234\_plate\_23 senescence-associated protein 15 [Hemerocallis hybrid cultivar]  
 AL813152 C06\_e411\_plate\_12 serine/threonine protein kinase, putative [Arabidopsis thaliana]  
 AL808464 F10\_a22\_plate\_11 seven in absentia (sina) protein family [Arabidopsis thaliana]  
 AL813951 F11\_e512\_plate\_13 signal recognition particle - related [Arabidopsis thaliana]  
 AL814828 H01\_h116\_plate\_3 similar to HRP11 [Rattus norvegicus]  
 AL812337 F03\_e310\_plate\_2 sucrose transporter SUT1D [Triticum aestivum]  
 AL827975 C10\_p739\_plate\_4 sucrose-phosphate synthase [Saccharum officinarum]  
 AL820630 G11\_o232\_plate\_15 thionin precursor - gamma-barley  
 AL815435 A02\_j223\_plate\_5 thionin precursor-gamma - barley  
 AL808317 C01\_a22\_plate\_15 transducin / WD-40 repeat protein family [Arabidopsis thaliana]  
 AL814284 D08\_e512\_plate\_7 transferase - related [Arabidopsis thaliana]  
 AL818580 E06\_j125\_plate\_8 translation elongation factor 1-alpha [Choanephora cucurbitarum]  
 AL827086 E09\_p638\_plate\_7 uclacyanin 3-like protein [Oryza sativa]  
 AL815587 C08\_j223\_plate\_7 unknown [Arabidopsis thaliana]  
 AL814036 E03\_e512\_plate\_15 unknown [Arabidopsis thaliana]  
 AL813940 E08\_e512\_plate\_13 unknown [Arabidopsis thaliana]  
 AL812123 E01\_e310\_plate\_11 unknown [Triticum aestivum]  
 AL815032 A11\_h116\_plate\_7 unknown protein [Arabidopsis thaliana]  
 AL817877 G08\_j226\_plate\_12 unknown protein [Arabidopsis thaliana]  
 AL827127 A06\_p638\_plate\_7 unknown protein [Oryza sativa (japonica cultivar-group)]  
 AL825260 D01\_p335\_plate\_7 unknown protein [Oryza sativa (japonica cultivar-group)]  
 AL818133 E04\_j223\_plate\_12 unknown protein [Oryza sativa (japonica cultivar-group)]  
 AL813445 G09\_e29\_plate\_7 unknown protein [Oryza sativa (japonica cultivar-group)]  
 AL811228 G12\_d37\_plate\_2 unknown protein [Oryza sativa (japonica cultivar-group)]  
 AL825738 D09\_p234\_plate\_15 unknown protein [Oryza sativa]  
 AL817031 H03\_j324\_plate\_1 unnamed protein product [Arabidopsis thaliana] contains similarity to EH domain containing  
 AL826082 A05\_p436\_plate\_3 unnamed protein product [Oryza sativa (japonica cultivar-group)]  
 AL827122 B01\_p638\_plate\_7 unnamed protein product [Oryza sativa (japonica cultivar-group)]  
 AL819731 B10\_n129\_plate\_4 unnamed protein product [Oryza sativa (japonica cultivar-group)]  
 AL817461 C10\_j324\_plate\_11 unnamed protein product [Oryza sativa (japonica cultivar-group)]  
 AL820245 G08\_n130\_plate\_15 unnamed protein product [Oryza sativa (japonica cultivar-group)]  
 AL825285 H03\_p335\_plate\_7 Vacuolar ATP synthase subunit C (V-ATPase C subunit) [Vacuolar proton pump C subunit]  
 AL814440 A04\_h116\_plate\_11 vacuolar proton-ATPase [Hordeum vulgare subsp. vulgare]  
 AL814743 D08\_h116\_plate\_2 WCI proteinase inhibitor [Triticum aestivum]  
 AL813630 A10\_e29\_plate\_12 WD-40 repeat protein family [Arabidopsis thaliana]  
 AL821528 F10\_p133\_plate\_13 WRKY20 [Oryza sativa (japonica cultivar-group)]

**List of sequences showing highest expression in N0 and N1 and lowest expression in FYM: Figure 2c1**

|          |                   |                                                                                                                  |
|----------|-------------------|------------------------------------------------------------------------------------------------------------------|
| AL820069 | F03_n130_plate_64 | 3-ketocyl-CoA thiolase-like protein [Oryza sativa (japonica cultivar-group)]                                     |
| AL821934 | C07_n130_plate_66 | 60S RIBOSOMAL PROTEIN L15                                                                                        |
| AL829767 | E08_p840_plate_7  | 68 kDa protein HP68 [Triticum aestivum]                                                                          |
| AL820201 | G03_n130_plate_63 | actin bundling protein ABP135 [imported] - trumpet lily                                                          |
| AL813792 | C02_e512_plate_10 | acyl CoA binding protein (ACBP) family [Arabidopsis thaliana]                                                    |
| AL817788 | C02_i226_plate_11 | ADP, ATP carrier protein, mitochondrial, putative/ADP/ATP translocase, putative/adenuine nucleotide translocator |
| AL809445 | F05_a11_plate_1   | ADP-ribosylation factor-like protein [Arabidopsis thaliana]                                                      |
| AL811858 | C11_d15_plate_17  | alcohol dehydrogenase class III (Glutathione-dependent formaldehyde dehydrogenase) (FDH) (FALDH) (GSH-FDH)       |
| AL824739 | E05_p234_plate_1  | allene oxide synthase [Triticum aestivum]                                                                        |
| AL820356 | H07_n130_plate_32 | alpha-amylase                                                                                                    |
| AL809520 | C05_a11_plate_4   | AP47/50p (gb/AAB88283.1) [Arabidopsis thaliana]                                                                  |
| AL816678 | G04_i226_plate_1  | asparagine synthetase 2 [Hordeum vulgare]                                                                        |
| AL822489 | F01_p234_plate_26 | ATP sulfurylase [Glycine max]                                                                                    |
| AL812595 | A08_e310_plate_6  | ATP-dependent Clp protease proteolytic subunit (ClpR3), putative [Arabidopsis thaliana]                          |
| AL819728 | B04_n129_plate_4  | ATP-dependent RNA helicase-like protein [Arabidopsis thaliana]                                                   |
| AL823170 | C01_p133_plate_12 | beta 5 subunit of 20S proteasome [Oryza sativa (japonica cultivar-group)]                                        |
| AL828022 | A10_p739_plate_5  | beta3-galacturonyltransferase [Triticum aestivum]                                                                |
| AL810544 | B07_e29_plate_4   | CAA30376.1 protein [Oryza sativa]                                                                                |
| AL808747 | D11_a22_plate_7   | calmodulin-binding protein [Arabidopsis thaliana]                                                                |
| AL808512 | D11_a22_plate_10  | chaperonin, putative [Arabidopsis thaliana]                                                                      |
| AL825177 | C06_p335_plate_6  | COLD SHOCK PROTEIN CS66                                                                                          |
| AL811912 | A08_d15_plate_18  | cystatin [Triticum aestivum]                                                                                     |
| AL819788 | B12_n129_plate_5  | cysteine protease component of protease-inhibitor complex [Zea mays]                                             |
| AL812819 | E06_e411_plate_3  | cytosolic monodehydroascorbate reductase [Oryza sativa (japonica cultivar-group)]                                |
| AL811236 | A01_d37_plate_3   | dehydrogenase/reductase family protein [Arabidopsis thaliana]                                                    |
| AL821762 | B02_n130_plate_56 | dihydroipoamide S-acyltransferase [Arabidopsis thaliana]                                                         |
| AL817204 | H06_j324_plate_5  | embryonic abundant protein, group 3 - wheat (fragment)                                                           |
| AL820800 | B11_o232_plate_5  | EST B1088C09.3 [Oryza sativa (japonica cultivar-group)]                                                          |
| AL809799 | A01_a11_plate_10  | EST B1153F04.17 [Oryza sativa (japonica cultivar-group)]                                                         |
| AL809494 | G01_a11_plate_3   | EST OJ991113_30.8 [Oryza sativa (japonica cultivar-group)]                                                       |
| AL810580 | F06_e29_plate_4   | EST OSJNBa0004N05.4 [Oryza sativa (japonica cultivar-group)]                                                     |
| AL826258 | B07_p436_plate_8  | EST OSJNBa0016N04.19 [Oryza sativa (japonica cultivar-group)]                                                    |
| AL821687 | A07_n130_plate_39 | EST OSJNBa0035H04.7 [Oryza sativa (japonica cultivar-group)]                                                     |
| AL823157 | A10_p133_plate_12 | EST OSJNBa0043L24.13 [Oryza sativa (japonica cultivar-group)]                                                    |
| AL822688 | B05_p335_plate_1  | EST OSJNBa0070D17.16 [Oryza sativa (japonica cultivar-group)]                                                    |
| AL812363 | A04_e310_plate_3  | EST OSJNBa0095E20.10 [Oryza sativa (japonica cultivar-group)]                                                    |
| AL808992 | F02_e22_plate_12  | EST OSJNBa0072N21.15 [Oryza sativa (japonica cultivar-group)]                                                    |
| AL812386 | C08_e310_plate_3  | EST P0408G07.24 [Oryza sativa (japonica cultivar-group)]                                                         |
| AL821653 | A04_n130_plate_63 | EST P0408G07.8 [Oryza sativa (japonica cultivar-group)]                                                          |
| AL822456 | H12_p234_plate_25 | EST P0410E03.18 [Oryza sativa (japonica cultivar-group)]                                                         |
| AL822610 | G04_p335_plate_10 | EST P0497A05.20 [Oryza sativa (japonica cultivar-group)]                                                         |
| AL813641 | B11_e29_plate_12  | EST P0529E05.15 [Oryza sativa (japonica cultivar-group)]                                                         |
| AL809311 | G04_a11_plate_16  | EST P0707D10.18 [Oryza sativa (japonica cultivar-group)]                                                         |
| AL826477 | E02_p537_plate_3  | eukaryotic translation initiation factor 4B [Triticum aestivum]                                                  |
| AL817587 | D02_i226_plate_8  | expressed protein [Arabidopsis thaliana]                                                                         |
| AL813808 | E05_e512_plate_10 | expressed protein [Arabidopsis thaliana]                                                                         |
| AL821285 | F09_p133_plate_6  | expressed protein [Arabidopsis thaliana]                                                                         |
| AL817871 | F10_i226_plate_12 | expressed protein [Arabidopsis thaliana]                                                                         |
| AL820207 | G04_n130_plate_38 | expressed protein [Arabidopsis thaliana]                                                                         |
| AL808468 | E07_a22_plate_17  | expressed protein [Arabidopsis thaliana]                                                                         |
| AL820133 | F09_n130_plate_41 | expressed protein [Arabidopsis thaliana]                                                                         |
| AL813501 | A10_e29_plate_10  | GAMYB-binding protein [Hordeum vulgare subsp. vulgare]                                                           |
| AL826301 | G05_p436_plate_8  | gene_id:MNC6.16-unknown protein [Arabidopsis thaliana]                                                           |
| AL824774 | E10_p234_plate_2  | glucosyltransferase [Triticum aestivum]                                                                          |
| AL820797 | B10_o232_plate_8  | Glyceraldehyde 3-phosphate dehydrogenase (GAPDH)                                                                 |
| AL810462 | H08_e29_plate_2   | GTP-binding protein rab2 - rice                                                                                  |
| AL822483 | E05_p234_plate_26 | H+-transporting two-sector ATPase (EC 3.6.3.14) beta chain,                                                      |
| AL826254 | A12_p436_plate_8  | haloacid dehalogenase-like hydrolase family [Arabidopsis thaliana]                                               |
| AL826066 | G01_p436_plate_1  | Histone Octamer Chain D, Chromosomal Protein, Alpha Carbons Only                                                 |
| AL820636 | H11_o232_plate_15 | hypothetical protein (probable V-ATPase, 20K chain [imported]) - Neurospora crassa )                             |
| AL823227 | C02_p133_plate_1  | hypothetical protein [Arabidopsis thaliana]                                                                      |
| AL826262 | B11_p436_plate_8  | hypothetical protein [Oryza sativa (japonica cultivar-group)]                                                    |
| AL810506 | F02_e29_plate_3   | Hypothetical protein [Oryza sativa]                                                                              |
| AL813198 | C01_e411_plate_13 | hypothetical protein F21F14.180 - Arabidopsis thaliana                                                           |
| AL827647 | C10_p638_plate_13 | hypothetical protein-similar to Arabidopsis thaliana chromosome 3, [Oryza sativa (japonica cultivar-group)]      |
| AL821787 | B04_n130_plate_66 | initiation factor 3g [Arabidopsis thaliana]                                                                      |
| AL812347 | G06_e310_plate_2  | inorganic pyrophosphatase [Oryza sativa]                                                                         |
| AL823140 | G12_p133_plate_11 | mitochondrial aldehyde dehydrogenase ALDH2 [Hordeum vulgare subsp. vulgare]                                      |
| AL811964 | G08_d15_plate_18  | molybdenum cofactor biosynthesis protein Cnx1 [Hordeum vulgare]                                                  |
| AL817242 | H05_j324_plate_6  | myosin heavy chain-related [Arabidopsis thaliana]                                                                |
| AL816830 | C04_i226_plate_4  | NADH-ubiquinone oxidoreductase 24 kDa subunit, mitochondrial precursor                                           |
| AL817536 | E11_i226_plate_7  | NADP-dependent oxidoreductase, putative [Arabidopsis thaliana]                                                   |
| AL809259 | B06_a11_plate_13  | nitrilase-like protein [imported] - rice                                                                         |
| AL826113 | E09_p436_plate_3  | nitrilase-like protein [imported] - rice                                                                         |
| AL808540 | H10_A22_plate_10  | nitrophenylphosphatase-like protein [Arabidopsis thaliana]                                                       |
| AL828089 | C11_p436_plate_10 | no hits                                                                                                          |
| AL821623 | A01_n130_plate_52 | no hits                                                                                                          |
| AL821632 | A02_n130_plate_41 | no hits                                                                                                          |
| AL822622 | A04_p335_plate_11 | no hits                                                                                                          |
| AL810771 | A05_d26_plate_11  | no hits                                                                                                          |
| AL823284 | A05_p133_plate_2  | no hits                                                                                                          |
| AL816573 | A07_j122_plate_7  | no hits                                                                                                          |
| AL816927 | A11_i226_plate_6  | no hits                                                                                                          |
| AL825103 | B03_p234_plate_13 | no hits                                                                                                          |
| AL816701 | B05_i226_plate_2  | no hits                                                                                                          |
| AL817509 | B10_i226_plate_7  | no hits                                                                                                          |
| AL820806 | C01_o232_plate_2  | no hits                                                                                                          |
| AL813274 | C05_e411_plate_15 | no hits                                                                                                          |
| AL818119 | C07_j223_plate_12 | no hits                                                                                                          |
| AL815777 | C08_j122_plate_9  | no hits                                                                                                          |
| AL817795 | C10_i226_plate_11 | no hits                                                                                                          |
| AL810889 | D03_d26_plate_13  | no hits                                                                                                          |
| AL809259 | D11_a11_plate_13  | no hits                                                                                                          |
| AL826113 | E09_p436_plate_3  | no hits                                                                                                          |
| AL813171 | F04_e411_plate_12 | no hits                                                                                                          |
| AL818413 | G01_i125_plate_1  | no hits                                                                                                          |
| AL819559 | G02_n129_plate_11 | no hits                                                                                                          |
| AL808893 | G12_a22_plate_9   | no hits                                                                                                          |
| AL820311 | H02_n130_plate_63 | no hits                                                                                                          |
| AL821108 | H02_o232_plate_4  | no hits                                                                                                          |
| AL826133 | H05_p436_plate_3  | no hits                                                                                                          |
| AL826241 | H05_p436_plate_7  | no hits                                                                                                          |
| AL810525 | H06_e29_plate_3   | no hits                                                                                                          |
| AL811826 | H08_d15_plate_16  | no hits                                                                                                          |
| AL821136 | H08_o232_plate_4  | no hits                                                                                                          |
| AL821159 | H12_o232_plate_10 | no hits                                                                                                          |
| AL822272 | A07_p234_plate_22 | no hits                                                                                                          |
| AL811415 | A08_d37_plate_7   | no hits                                                                                                          |
| AL821729 | A11_n130_plate_56 | no hits                                                                                                          |
| AL821730 | A11_n130_plate_66 | no hits                                                                                                          |
| AL808725 | B03_a22_plate_7   | no hits                                                                                                          |
| AL821775 | B03_n130_plate_56 | no hits                                                                                                          |
| AL809764 | B04_a11_plate_9   | no hits                                                                                                          |
| AL825649 | B07_p234_plate_14 | no hits                                                                                                          |
| AL829550 | B08_p840_plate_2  | no hits                                                                                                          |
| AL829870 | C11_p840_plate_10 | no hits                                                                                                          |
| AL814464 | D04_b116_plate_11 | no hits                                                                                                          |
| AL809165 | D09_a11_plate_13  | no hits                                                                                                          |
| AL817802 | D10_i226_plate_11 | no hits                                                                                                          |
| AL815975 | E05_j122_plate_12 | no hits                                                                                                          |

|          |                   |                                                                                                         |
|----------|-------------------|---------------------------------------------------------------------------------------------------------|
| AL819371 | E05_n129_plate_19 | no hits                                                                                                 |
| AL808881 | F04_a22_plate_9   | no hits                                                                                                 |
| AL809398 | F10_a11_plate_11  | no hits                                                                                                 |
| AL816966 | F10_j226_plate_6  | no hits                                                                                                 |
| AL809129 | G01_a11_plate_12  | no hits                                                                                                 |
| AL828005 | G03_p739_plate_4  | no hits                                                                                                 |
| AL818665 | G05_j125_plate_11 | no hits                                                                                                 |
| AL809553 | G10_a11_plate_4   | no hits                                                                                                 |
| AL811408 | G10_d37_plate_6   | no hits                                                                                                 |
| AL820274 | G10_n130_plate_64 | no hits                                                                                                 |
| AL820275 | G10_n130_plate_66 | no hits                                                                                                 |
| AL827549 | G12_p638_plate_11 | no hits                                                                                                 |
| AL820393 | H10_n130_plate_63 | no hits                                                                                                 |
| AL808713 | H11_a22_plate_6   | no hits                                                                                                 |
| AL813966 | A11_e512_plate_14 | nucleosome/chromatin assembly factor group A [Zea mays]                                                 |
| AL808700 | G05_a22_plate_6   | OsNAC8 protein [Oryza sativa]                                                                           |
| AL828757 | B03_p739_plate_9  | oxoglutarate/malate translocator, putative [Arabidopsis thaliana]                                       |
| AL819032 | H06_n129_plate_7  | pentatricopeptide (PPR) repeat-containing protein-like protein [Oryza sativa (japonica cultivar-group)] |
| AL822345 | B10_p234_plate_23 | peptidylprolyl isomerase-like protein [Arabidopsis thaliana]                                            |
| AL822178 | G09_p234_plate_20 | phytoalexin-deficient 4 protein (pad4) [Arabidopsis thaliana]                                           |
| AL811991 | B10_d15_plate_19  | probable b-keto acyl reductase (EC 1.1.-.-) - barley                                                    |
| AL825660 | C08_p234_plate_14 | probable RING3 protein [imported] - Arabidopsis thaliana                                                |
| AL823134 | G01_p133_plate_11 | prokaryotic DNA polymerase III gamma subunit -related [Arabidopsis thaliana]                            |
| AL808673 | A11_a22_plate_6   | Proteasome subunit alpha type 3 (20S proteasome alpha subunit G) (20S proteasome subunit alpha-7)       |
| AL809221 | E07_a11_plate_14  | PUTATIVE 3,4-DIHYDROXY-2-BUTANONE KINASE                                                                |
| AL811404 | F06_d37_plate_6   | putative adaptor protein/ adaptin-like [Oryza sativa (japonica cultivar-group)]                         |
| AL819856 | B02_n129_plate_6  | putative angio-associated migratory cell protein [Oryza sativa]                                         |
| AL828193 | C08_n130_plate_63 | putative AP2-related transcription factor [Oryza sativa]                                                |
| AL809085 | H12_a11_plate_10  | putative ATP synthase delta chain, mitochondrial precursor [Oryza sativa (japonica cultivar-group)]     |
| AL820573 | F08_o232_plate_14 | putative CMP-sialic acid transporter [Oryza sativa (japonica cultivar-group)]                           |
| AL811816 | G09_d15_plate_16  | putative ethylene-responsive small GTP-binding protein [Oryza sativa (japonica cultivar-group)]         |
| AL815973 | E03_j122_plate_12 | putative gag-pol precursor [Oryza sativa (japonica cultivar-group)]                                     |
| AL809339 | F03_a11_plate_17  | putative GMP synthase [Oryza sativa (japonica cultivar-group)]                                          |
| AL820023 | E11_n130_plate_42 | putative homeodomain-leucine zipper protein [Oryza sativa (japonica cultivar-group)]                    |
| AL810268 | C01_d15_plate_9   | Putative hydrolase [Oryza sativa]                                                                       |
| AL820561 | B10_o232_plate_14 | putative protein phosphatase [Oryza sativa (japonica cultivar-group)]                                   |
| AL808898 | H10_a22_plate_9   | putative serine carboxypeptidase II-3 precursor [Oryza sativa (japonica cultivar-group)]                |
| AL810258 | A11_d15_plate_9   | putative splicing regulatory protein [Oryza sativa (japonica cultivar-group)]                           |
| AL819722 | A03_n129_plate_4  | putative taxadien-5-alpha-ol O-acetyltransferase [Oryza sativa (japonica cultivar-group)]               |
| AL823451 | E11_p133_plate_4  | putative xylose kinase [Oryza sativa (japonica cultivar-group)]                                         |
| AL808900 | H12_a22_plate_9   | putative z-protein [Oryza sativa (japonica cultivar-group)]                                             |
| AL827858 | D03_p739_plate_12 | quinone oxidoreductase homolog - cowpea                                                                 |
| AL818411 | F11_j125_plate_1  | replication licensing factor MCM7 homologue [Zea mays]                                                  |
| AL815322 | C12_j223_plate_3  | replication protein A, putative [Arabidopsis thaliana]                                                  |
| AL824765 | D01_p234_plate_2  | ribulose-bisphosphate carboxylase (EC 4.1.1.39) small chain                                             |
| AL808546 | A05_a22_plate_11  | S-adenosylmethionine synthetase 1 (Methionine adenosyltransferase 1) (AdoMet synthetase 1)              |
| AL808671 | A09_a22_plate_6   | Serine/threonine protein phosphatase PP2A-2 catalytic subunit                                           |
| AL816837 | D03_j226_plate_4  | Shikimate kinase, chloroplast precursor                                                                 |
| AL823448 | E07_p133_plate_4  | signal recognition particle receptor beta subunit-related protein                                       |
| AL819754 | F05_n129_plate_4  | SNF2 domain/helicase domain/RING finger domain-containing protein [Arabidopsis thaliana]                |
| AL822552 | H06_p234_plate_27 | steroid sulfotransferase-like protein [Arabidopsis thaliana]                                            |
| AL825595 | F11_p335_plate_19 | thioredoxin family [Arabidopsis thaliana]                                                               |
| AL814123 | E02_e512_plate_3  | translational elongation factor Tu [Oryza sativa]                                                       |
| AL826131 | H02_p436_plate_3  | translationally controlled tumor protein [Triticum aestivum]                                            |
| AL811692 | A04_d15_plate_15  | triose phosphate translocator [Triticum aestivum]                                                       |
| AL814759 | F12_h116_plate_2  | tumor-related protein -related [Arabidopsis thaliana]                                                   |
| AL808692 | F03_a22_plate_6   | ubiquitin-conjugating enzyme, putative [Arabidopsis thaliana]                                           |
| AL823053 | E09_p133_plate_10 | UDP-glucose 4-epimerase [Oryza sativa (japonica cultivar-group)]                                        |
| AL816776 | D06_j226_plate_3  | unknown [Arabidopsis thaliana]                                                                          |
| AL821120 | H05_o232_plate_1  | unknown [Zea mays]                                                                                      |
| AL820262 | G09_n130_plate_56 | unknown protein [Arabidopsis thaliana]                                                                  |
| AL808711 | H08_a22_plate_6   | unknown protein [Arabidopsis thaliana]                                                                  |
| AL809292 | B07_a11_plate_16  | unknown protein [Arabidopsis thaliana]                                                                  |
| AL813617 | H02_e29_plate_11  | unknown protein [Arabidopsis thaliana]                                                                  |
| AL826291 | F04_p436_plate_8  | unknown protein [Oryza sativa (japonica cultivar-group)]                                                |
| AL820383 | H09_n130_plate_56 | unknown protein [Oryza sativa (japonica cultivar-group)]                                                |
| AL826543 | D10_p537_plate_4  | unknown protein [Oryza sativa]                                                                          |
| AL819693 | E07_n129_plate_3  | unknown protein [Oryza sativa]                                                                          |
| AL819994 | E08_n130_plate_41 | unnamed protein product [Oryza sativa (japonica cultivar-group)]                                        |
| AL820643 | B01_o232_plate_16 | unnamed protein product [Oryza sativa (japonica cultivar-group)]                                        |
| AL810127 | E11_d15_plate_6   | Vacuolar ATP synthase 16 kDa proteolipid subunit                                                        |

**List of sequences showing low expression in the low nitrogen treatments and uniformly high expression at higher nitrogen treatments: Figure 2cii**

|          |                   |                                                                                   |
|----------|-------------------|-----------------------------------------------------------------------------------|
| AL811051 | H10_d26_plate_16  | Coatomer delta subunit (Delta-coat protein) (Delta-COP) (Archain)                 |
| AL825714 | B01_p234_plate_15 | defective protein 2 [Zea mays]                                                    |
| AL822269 | A03_p234_plate_22 | dTDP-glucose 4-6-dehydratase-like protein [Oryza sativa]                          |
| AL825657 | C05_p234_plate_14 | elongation factor -related [Arabidopsis thaliana]                                 |
| AL812132 | F02_e310_plate_11 | EST B1045D11.16 [Oryza sativa (japonica cultivar-group)]                          |
| AL811346 | A08_d37_plate_5   | GAMMA-HORDEIN 3                                                                   |
| AL827266 | A04_p638_plate_5  | geranylgeranyl hydrogenase [Glycine max]                                          |
| AL810328 | A09_e29_plate_1   | Histone H3                                                                        |
| AL821719 | A10_n130_plate_56 | hypothetical protein [Oryza sativa (japonica cultivar-group)]                     |
| AL826320 | C10_p436_plate_9  | hypothetical protein [Oryza sativa (japonica cultivar-group)]                     |
| AL812766 | F08_e310_plate_8  | membrane protein [Saccharum hybrid cultivar H65-7052]                             |
| AL822495 | F10_p234_plate_26 | Na <sup>+</sup> /H <sup>+</sup> antiporter [Triticum aestivum]                    |
| AL810738 | A10_d26_plate_8   | no hits                                                                           |
| AL822985 | C12_p335_plate_5  | no hits                                                                           |
| AL814234 | D02_e512_plate_6  | no hits                                                                           |
| AL816529 | D12_j122_plate_6  | no hits                                                                           |
| AL810756 | E04_d26_plate_8   | putative gag/pol polyprotein, 5'-partial [Oryza sativa (japonica cultivar-group)] |
| AL813317 | A09_e411_plate_2  | putative gamma-adaptin 1 [Oryza sativa (japonica cultivar-group)]                 |
| AL823091 | B04_p133_plate_11 | putative phosphoinositide kinase [Oryza sativa]                                   |
| AL812718 | A01_e310_plate_8  | Putative serine/threonine kinase [Oryza sativa (japonica cultivar-group)]         |
